# Supplementary material
Source: Springer Nature journal article supplement (https://www.springermedizin.de/resource/supplementary/13256_2010_1662_MOESM5_ESM.pdf/9648032)

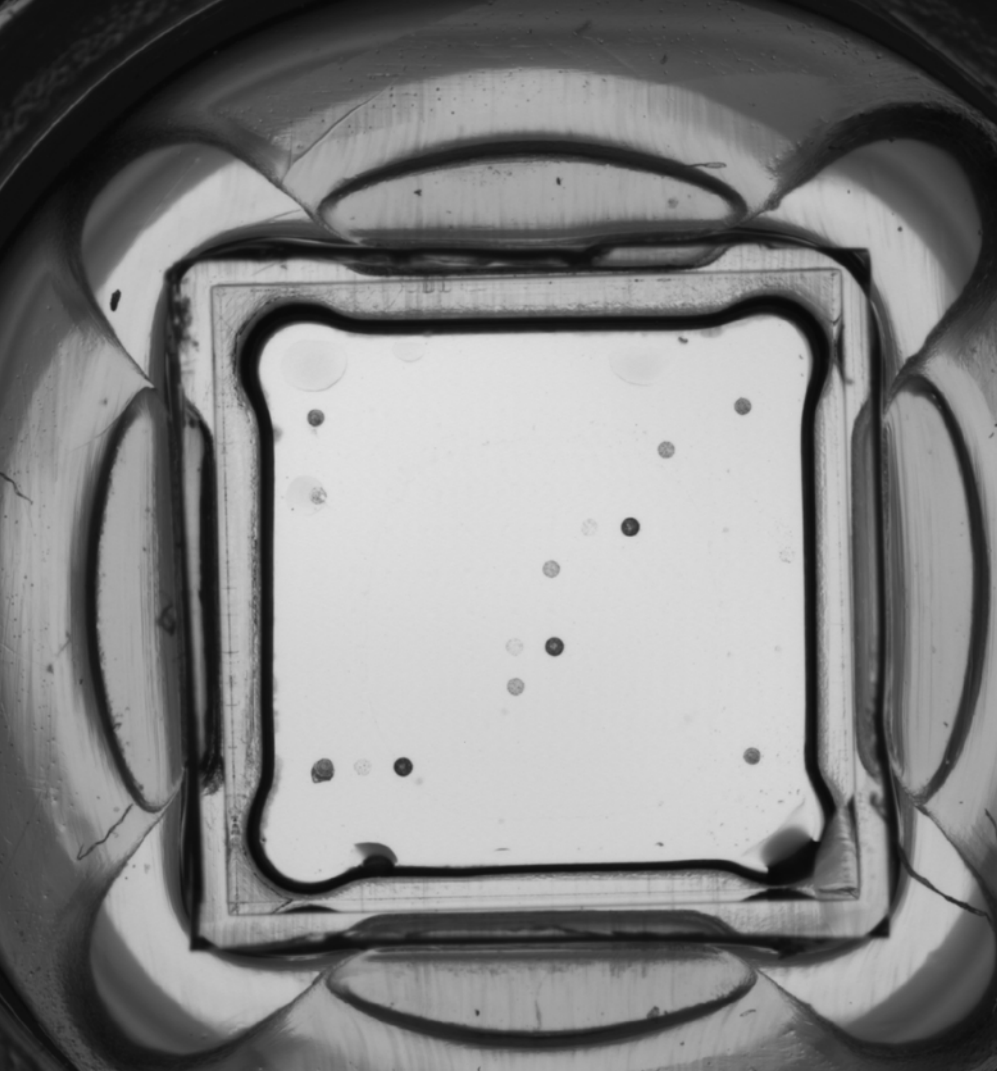

Supplement: MOESM5 [file 9648032]
